# Supplementary material for: Antimicrobial Properties of Lepidium sativum L. Facilitated Silver Nanoparticles
Source: Pharmaceutics. 2021 Aug 27;13(9):1352. doi: 10.3390/pharmaceutics13091352 (PMC8466285; doi:10.3390/pharmaceutics13091352)
Supplement: Supplementary file 1 [file pharmaceutics-13-01352-s001.zip › pharmaceutics-1340365-supplementary.pdf]

## Supplementary materials: Antimicrobial Properties of *Lepidium sativum* L. Facilitated Silver Nanoparticles

Samir Haj Bloukh, Zehra Edis , Hamid Abu Sara and Mustafa Ameen Alhamaidah

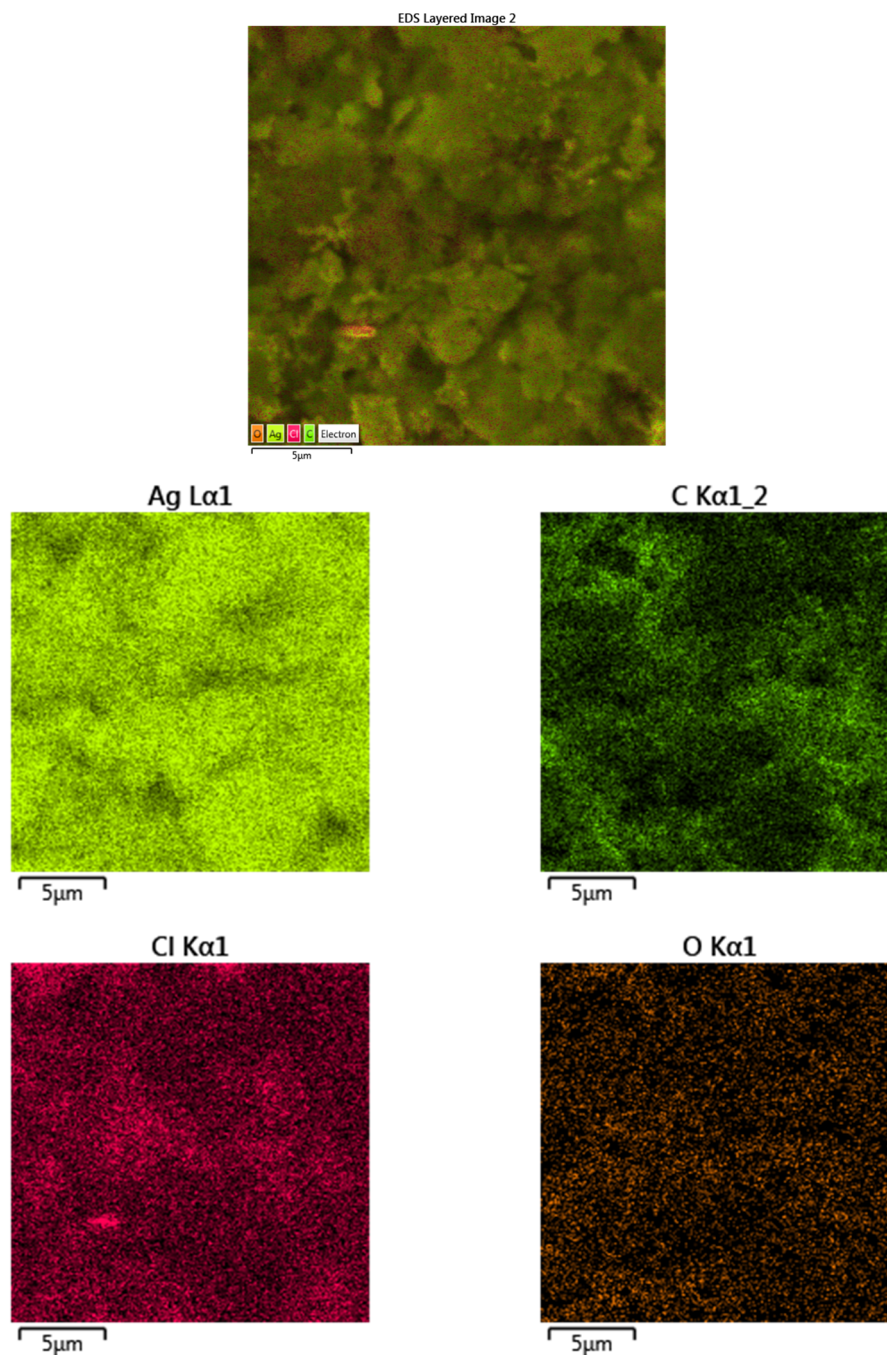

**Figure S1:** Layered EDS.

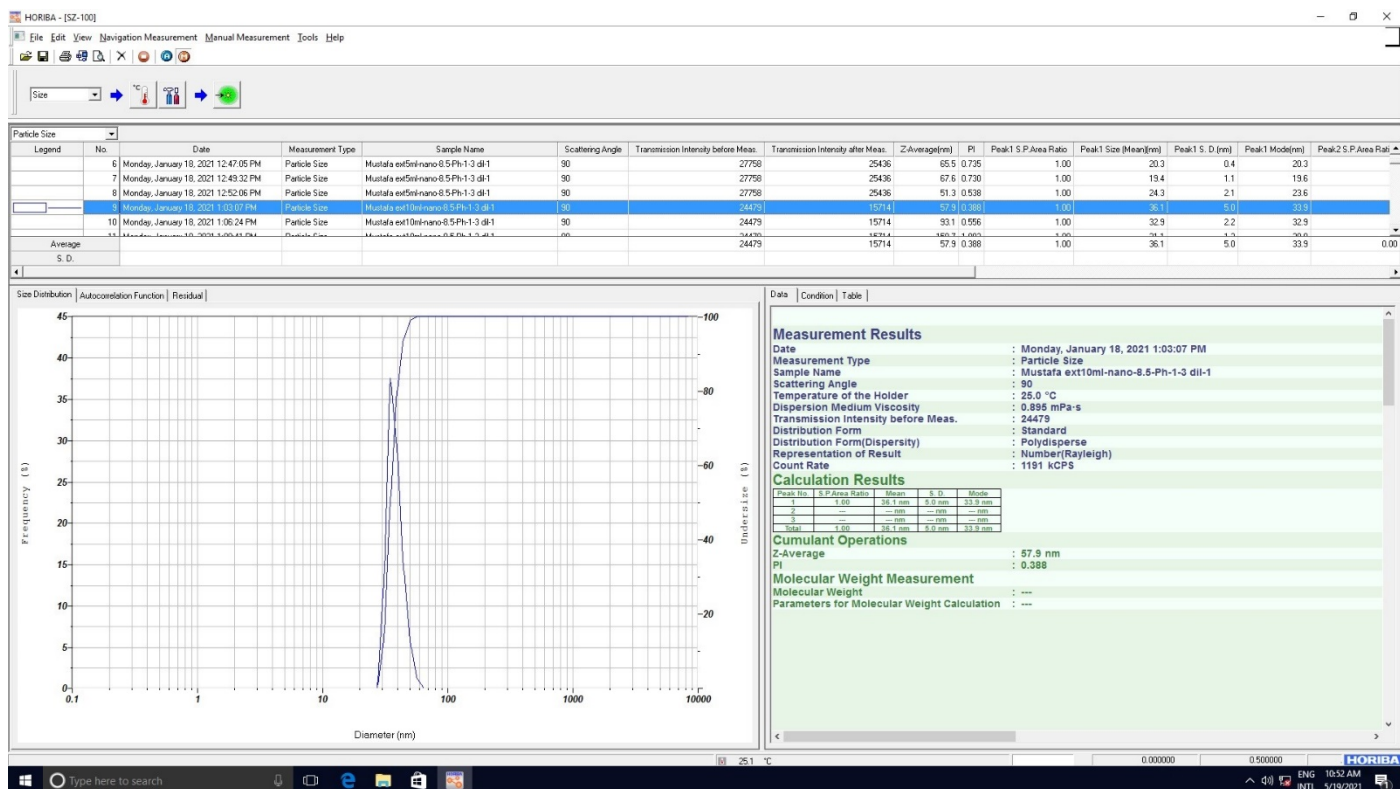

Figure S2: DLS.

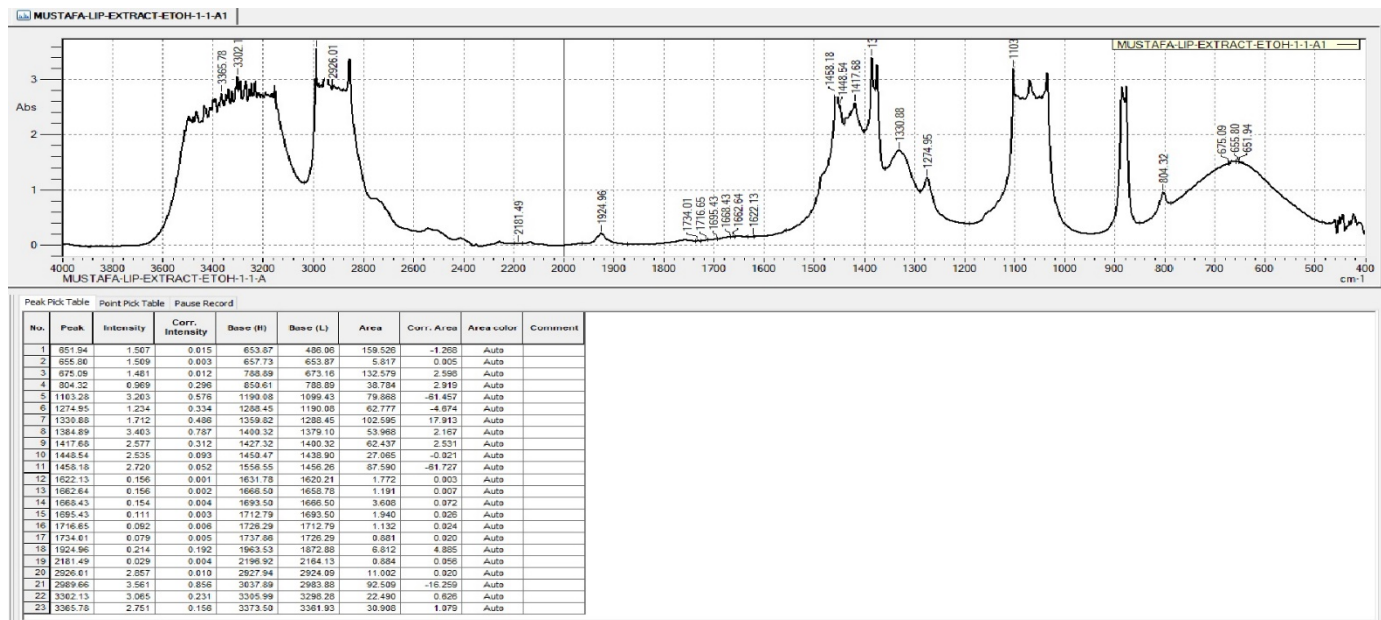

Figure S3: FTIR-Pure LS extract in ethanol.

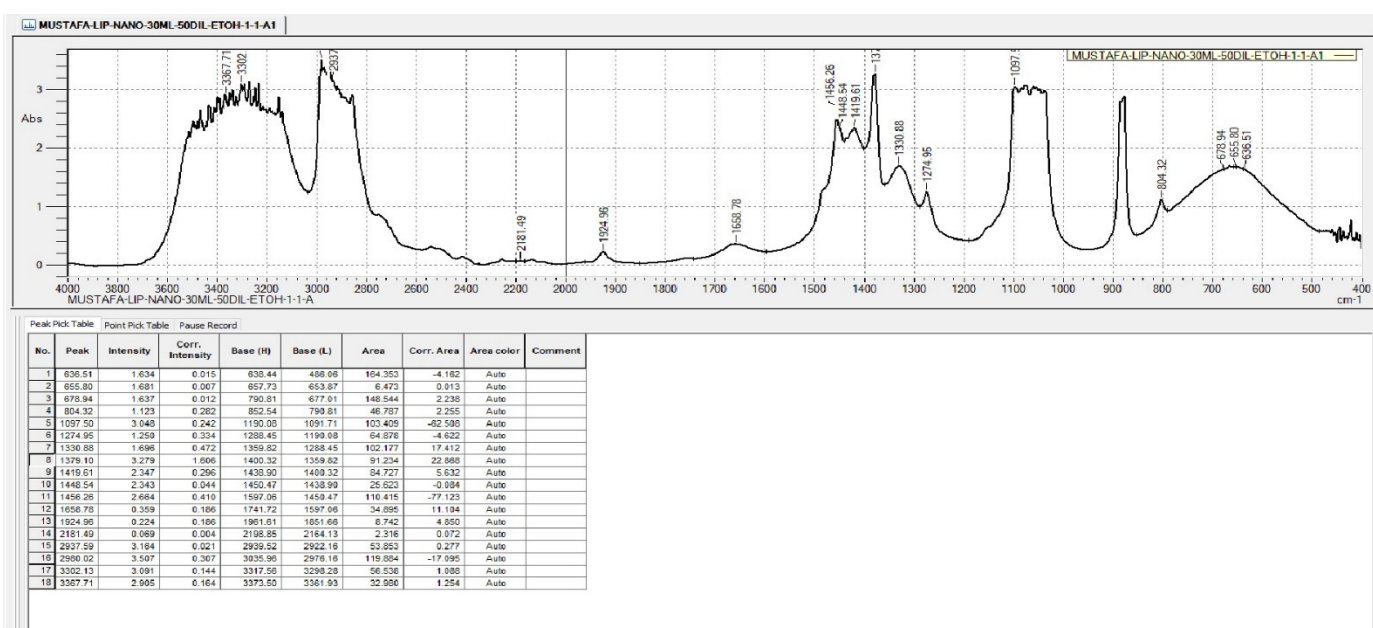

Figure S4: FTIR-LS-AgNP in ethanol.
